# Supplementary material for: Molecular Cloning and Characterization of Different Expression of MYOZ2 and MYOZ3 in Tianfu Goat
Source: PLoS One. 2013 Dec 18;8(12):e82550. doi: 10.1371/journal.pone.0082550 (PMC3867352; doi:10.1371/journal.pone.0082550)
Supplement: Table S2 — List of the MYOZ2 and MYOZ3 sequences used in phylogenetic tree analysis. (XLS) [file pone.0082550.s010.xls]

## Sheet: Sheet1
Table S2. List of the MYOZ2 and MYOZ3 sequences used in phylogenetic tree analysis
Organism	Gene	GenBank ID	Gene	GenBank ID
Tianfu goat	MYOZ2	JX573191	MYOZ3	KC537058
Ovis aries	MYOZ2	NM001199222.1	MYOZ3	NM001199795.1
Bos taurus	MYOZ2	NM001015676.1	MYOZ3	NM001078039.1
Sus scrofa	MYOZ2	NM001044593.1	MYOZ3	NM001044594.1
Homo sapiens	MYOZ2	NM016599.4	MYOZ3	AF480443.1
Pan troglodytes	MYOZ2	XM001148878.1	MYOZ3	XM001166620.2
Canis lupus familiaris	MYOZ2	XM535703.3	MYOZ3	XM862458.2
Mus musculus	MYOZ2	NM021503.2	MYOZ3	NM133363.3
Rattus norvegicus	MYOZ2	NM001106469.1	MYOZ3	XM002725359.2
Gorilla gorilla gorilla	MYOZ2	XM004040322.1	MYOZ3	XM004042830.1
Xenopus tropicalis	MYOZ2	NM001011415.1	MYOZ3	NM001011273.1
